# Supplementary material
Source: Springer Nature journal article supplement (https://www.springermedizin.de/resource/supplementary/12936_2010_1373_MOESM3_ESM.pdf/9549630)
Supplement: MOESM3 [file 9549630]

**Table 2:**  
**Neuropsychiatric and neurological disorder examination at baseline**

| Symptom                      | Yes |      | No  |       | ND  |      |
|------------------------------|-----|------|-----|-------|-----|------|
|                              | N   | %    | N   | %     | N   | %    |
| Dizziness                    | 93  | 43.7 | 120 | 56.3  | .   | .    |
| Headache                     | 85  | 39.9 | 114 | 53.5  | 14  | 6.6  |
| Vertigo                      | 14  | 6.6  | 191 | 89.7  | 8   | 3.8  |
| Convulsions                  | .   | .    | 213 | 100.0 | .   | .    |
| Paraesthesia                 | 1   | 1.2  | 77  | 93.9  | 4   | 4.9  |
| Dysaesthesia                 | .   | .    | 78  | 95.1  | 4   | 4.9  |
| Sleeplessness (insomnia)     | 85  | 39.9 | 128 | 60.1  | .   | .    |
| Nightmares                   | 2   | 6.5  | 28  | 90.3  | 1   | 3.2  |
| Hyperactivity                | 18  | 8.5  | 195 | 91.5  | .   | .    |
| Anxiety                      | 26  | 12.2 | 187 | 87.8  | .   | .    |
| Panic Attack                 | 30  | 14.1 | 183 | 85.9  | .   | .    |
| Unexplained sadness          | 23  | 10.8 | 190 | 89.2  | .   | .    |
| Mood changes                 | 25  | 11.7 | 188 | 88.3  | .   | .    |
| Confusion                    | 4   | 1.9  | 208 | 97.7  | 1   | 0.5  |
| Aggressive behavior          | 19  | 8.9  | 194 | 91.1  | .   | .    |
| Tension                      | 12  | 5.6  | 201 | 94.4  | .   | .    |
| Visual hallucinations        | 3   | 3.7  | 77  | 93.9  | 2   | 2.4  |
| Acoustic hallucinations      | .   | .    | 78  | 95.1  | 4   | 4.9  |
| Hearing loss                 | .   | .    | 211 | 99.1  | 2   | 0.9  |
| Dysarthria                   | 3   | 1.4  | 205 | 96.2  | 5   | 2.3  |
| Word finding disturbance (1) | .   | .    | 200 | 93.9  | 13  | 6.1  |
| Eating behavior              | 154 | 72.3 | 59  | 27.7  | .   | .    |
| Swallowing disturbance       | .   | .    | 213 | 100.0 | .   | .    |
| Tremor                       | .   | .    | 205 | 96.2  | 8   | 3.8  |
| Dystonia, ataxia             | 3   | 1.4  | 209 | 98.1  | 1   | 0.5  |
| Hyporeflexia                 | .   | .    | 213 | 100.0 | .   | .    |
| Hyporeflexia                 | 8   | 3.8  | 205 | 96.2  | .   | .    |
| Clonus                       | .   | .    | 213 | 100.0 | .   | .    |
| Dysdiadochokinesis           | 1   | 0.5  | 137 | 64.3  | 75  | 35.2 |
| Disturbed vision             | .   | .    | 128 | 60.1  | 85  | 39.9 |
| Nystagmus                    | .   | .    | 192 | 90.1  | 21  | 9.9  |
| Double vision                | 1   | 1.2  | 62  | 75.6  | 19  | 23.2 |
| Acoustic acuity              | 1   | 0.5  | 100 | 53.8  | 85  | 45.7 |
| Forgetfulness                | 1   | 0.5  | 70  | 32.9  | 142 | 66.7 |
| Word finding disturbance (2) | 1   | 1.2  | 68  | 82.9  | 13  | 15.9 |

Nightmares were only assessed in children 5 years in age or older

Paraesthesia, dysaesthesia, visual and acoustic hallucinations, double vision and word finding disturbance (2) were only assessed in children 3.5 years in age or older

Acoustic acuity was only assessed in children 1.5 years in age and or older
